# Supplementary material for: Receptor tyrosine kinase profiling of ischemic heart identifies ROR1 as a potential therapeutic target
Source: PubMed Central journal article supplement (PMC6196006; doi:10.1186/s12872-018-0933-y), 2018-10-20
Supplement: 12872_2018_933_MOESM2_ESM.pdf [file 12872_2018_933_MOESM2_ESM.pdf]

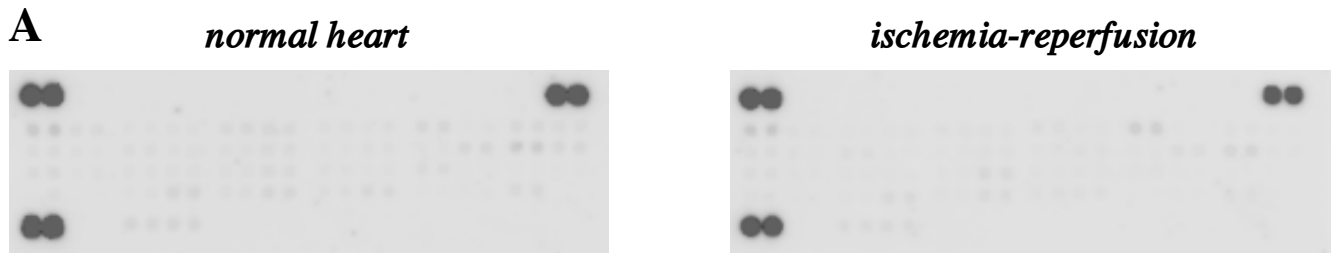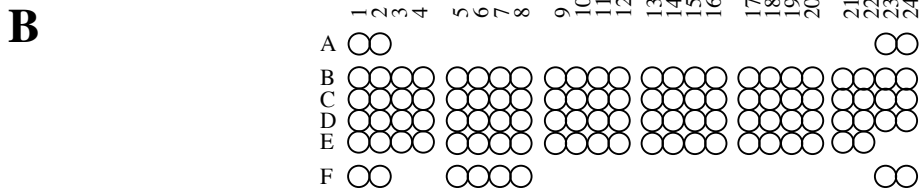

| Coordinate | RTK             | Coordinate | RTK              |
|------------|-----------------|------------|------------------|
| A1, A2     | Reference spots | D1, D2     | TEK              |
| A23, A24   | Reference spots | D3, D4     | NTRK1            |
| B1, B2     | EGFR            | D5, D6     | NTRK2            |
| B3, B4     | ERBB2           | D7, D8     | NTRK3            |
| B5, B6     | ERBB3           | D9, D10    | VEGFR1           |
| B7, B8     | ERBB4           | D11, D12   | VEGFR2           |
| B9, B10    | FGFR1           | D13, D14   | VEGFR3           |
| B11, B12   | FGFR2           | D15, D16   | MUSK             |
| B13, B14   | FGFR3           | D17, D18   | EPHA1            |
| B15, B16   | FGFR4           | D19, D20   | EPHA2            |
| B17, B18   | INSR            | D21, D22   | EPHA3            |
| B19, B20   | IGF1R           | D23, D24   | EPHA4            |
| B21, B22   | AXL             | E1, E2     | EPHA6            |
| B23, B24   | TYRO3           | E3, E4     | EPHA7            |
| C1, C2     | MERTK           | E5, E6     | EPHB1            |
| C3, C4     | MET             | E7, E8     | EPHB2            |
| C5, C6     | MST1R           | E9, E10    | EPHB4            |
| C7, C8     | PDGFRA          | E11, E12   | EPHB6            |
| C9, C10    | PDGFRB          | E13, E14   | ALK              |
| C11, C12   | KIT             | E15, E16   | DDR1             |
| C13, C14   | FLT3            | E17, E18   | DDR2             |
| C15, C16   | CSFR            | E19, E20   | EPHA5            |
| C17, C18   | RET             | E21, E22   | EPHA10           |
| C19, C20   | ROR1            | F1, F2     | Reference spots  |
| C21, C22   | ROR2            | F5, F6     | EPHB3            |
| C23, C24   | TIE1            | F7, F8     | RYK              |
|            |                 | F23, F24   | Negative control |

## Additional file 2
