# Supplementary material for: Receptor tyrosine kinase profiling of ischemic heart identifies ROR1 as a potential therapeutic target
Source: PubMed Central journal article supplement (PMC6196006; doi:10.1186/s12872-018-0933-y), 2018-10-20

**A**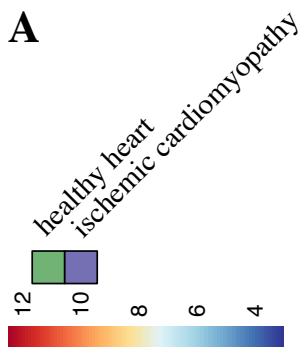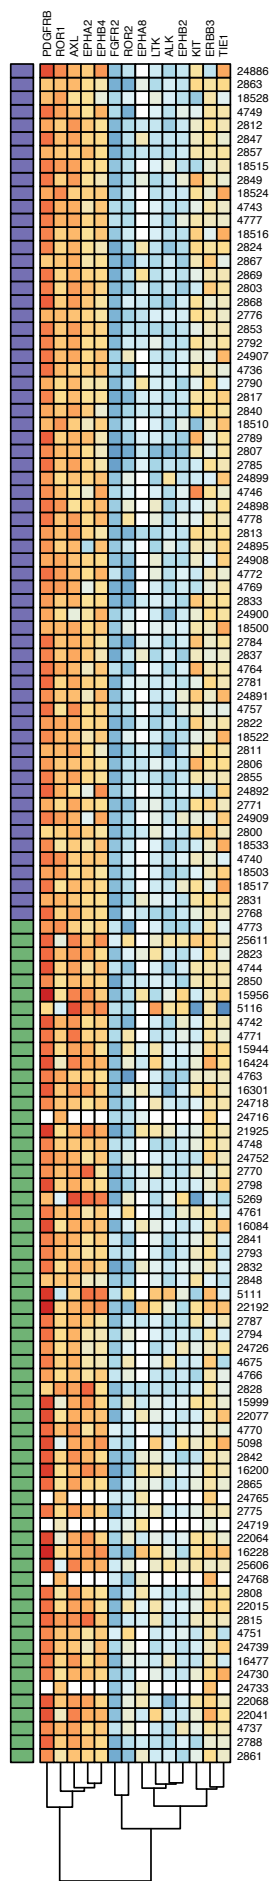**B**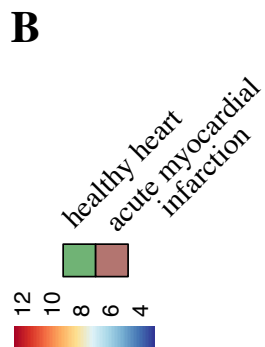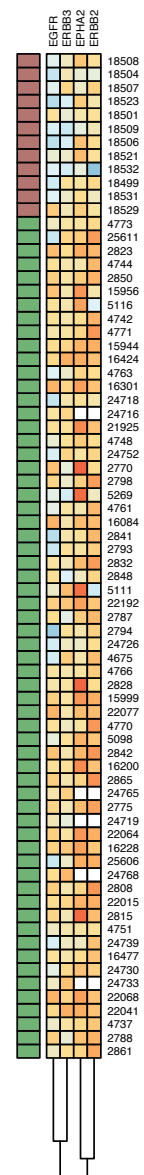

Supplement: 12872_2018_933_MOESM3_ESM.pdf [file 12872_2018_933_MOESM3_ESM.pdf]
