# Supplementary material for: Receptor tyrosine kinase profiling of ischemic heart identifies ROR1 as a potential therapeutic target
Source: Springer Nature journal article supplement (doi:10.1186/s12872-018-0933-y), 2018-10-20

**A**

|                                                |   |    |    |    |
|------------------------------------------------|---|----|----|----|
| <i>hypoxia (h):</i>                            | 1 | -  | 1  | -  |
| <i>reoxygenation (h):</i>                      | 0 | -  | 24 | -  |
| <i>control cells cultured in normoxia (h):</i> | - | 24 | -  | 48 |

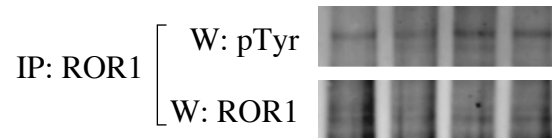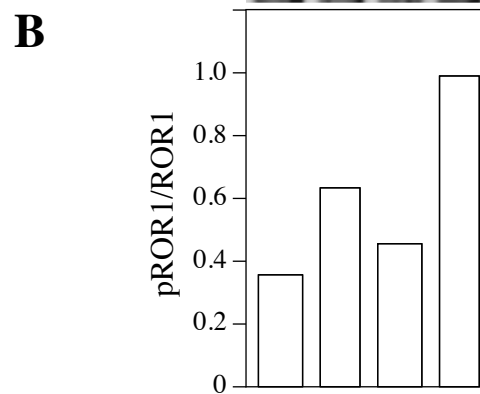

Supplement: MOESM6 [file 16214750]
